# Supplementary material for: Histone peptide microarray screen of chromo and Tudor domains defines new histone lysine methylation interactions
Source: PubMed Central journal article supplement (PMC5348760; doi:10.1186/s13072-017-0117-5), 2017-03-14

# Figure S3

## A

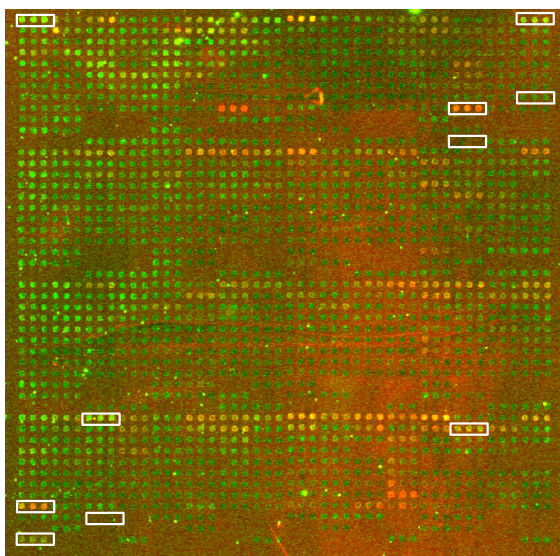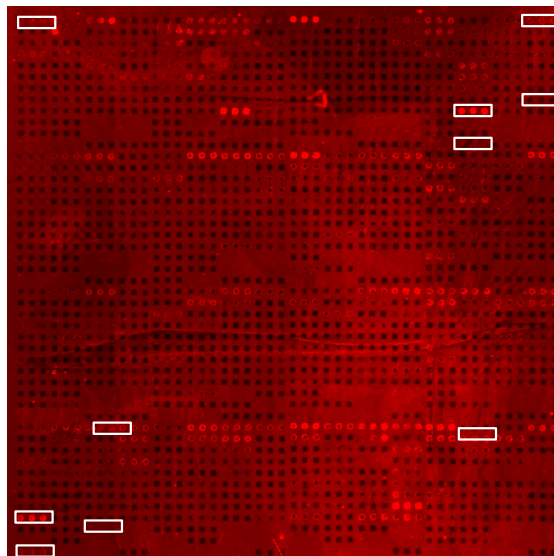

CHD1

## B

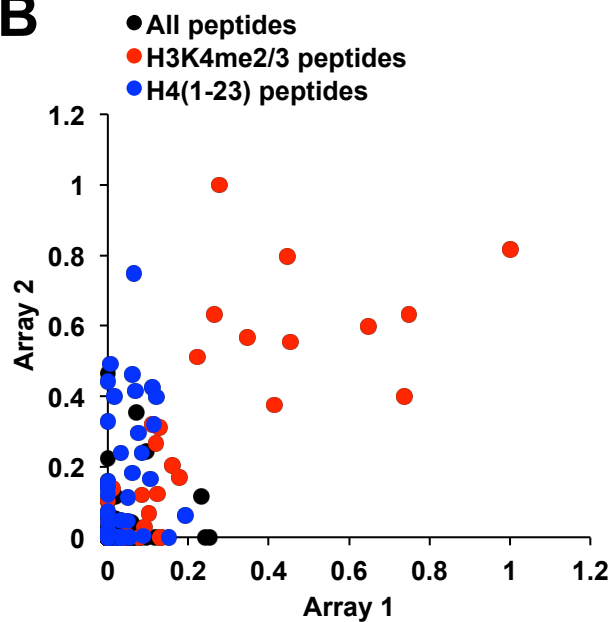

## C

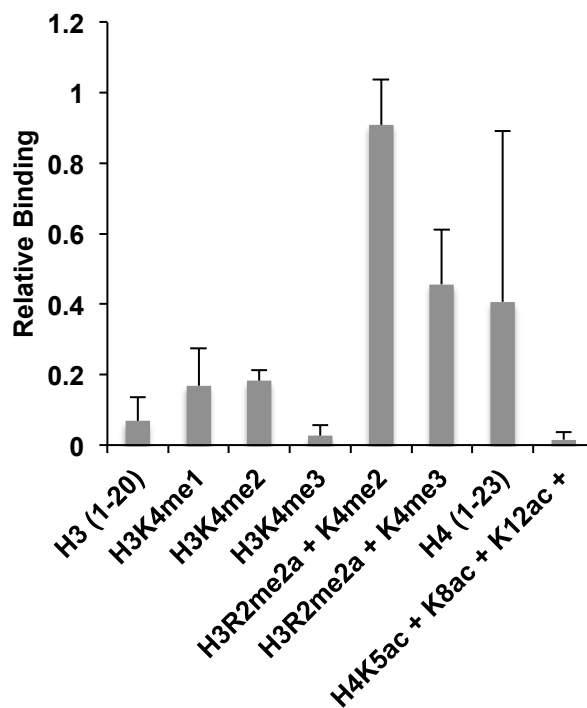

Supplement: 13072_2017_117_MOESM5_ESM.pdf [file 13072_2017_117_MOESM5_ESM.pdf]
