# Supplementary material for: Histone peptide microarray screen of chromo and Tudor domains defines new histone lysine methylation interactions
Source: PubMed Central journal article supplement (PMC5348760; doi:10.1186/s13072-017-0117-5), 2017-03-14
Supplement: 13072_2017_117_MOESM8_ESM.pdf [file 13072_2017_117_MOESM8_ESM.pdf]

**Figure S6**

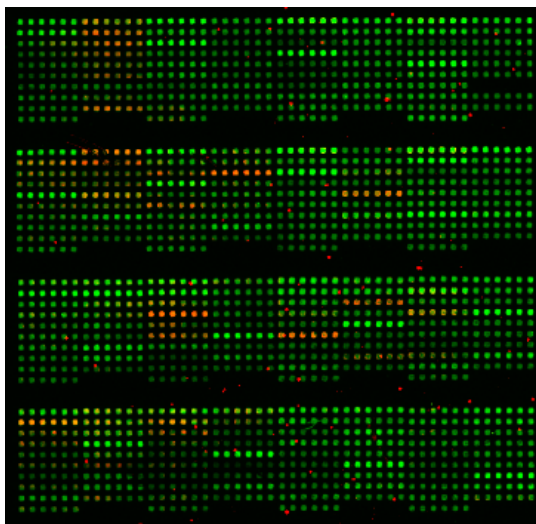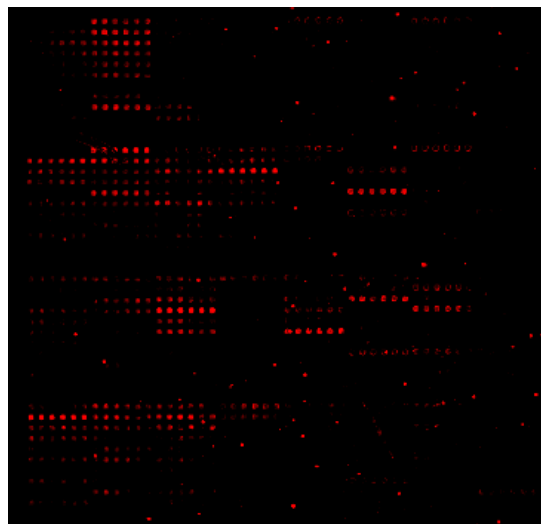

**TDRD3**
